# Supplementary material for: Segmentation of the Himalayas as revealed by arc-parallel gravity anomalies
Source: PubMed Central journal article supplement (PMC5030648; doi:10.1038/srep33866), 2016-09-21

Supplementary Material for the paper

**Segmentation of the Himalayas as revealed by arc-parallel gravity anomalies**

by

György Hetényi<sup>1,+,\*</sup>, Rodolphe Cattin<sup>2,x</sup>, Théo Berthet<sup>3</sup>, Nicolas Le Moigne<sup>2</sup>, Jamyang Chopel<sup>4</sup>, Sarah Lechmann<sup>5,+</sup>, Paul Hammer<sup>6,+</sup>, Dowchu Drukpa<sup>4</sup>, Soma Nath Sapkota<sup>7</sup>, Stéphanie Gautier<sup>2</sup>, Kinzang Thinley<sup>8</sup>

**AFFILIATIONS**

1 Institute of Earth Sciences, University of Lausanne, Géopolis, Quartier UNIL-Mouline, 1015 Lausanne, Switzerland

2 Géosciences Montpellier, CNRS UMR5243, Université de Montpellier, Place E. Bataillon, 34095 Montpellier, France

3 Department of Earth Sciences, Uppsala University, Villavägen 16, 75236 Uppsala, Sweden

4 Department of Geology and Mines, Ministry of Economic Affairs, PO Box 173 Thimphu, Bhutan

5 armasuisse, Science & Technology, Federal Department of Defence, Civil Protection and Sport, Feuerwerkerstrasse 39, 3602 Thun, Switzerland

6 SwissRe, Mythenquai 50/60, 8022 Zürich, Switzerland

7 Department of Mines and Geology, Lainchaur, Kathmandu, Nepal

8 National Land Commission, Kawang Jagsa, PO Box 142 Thimphu, Bhutan

+ Formerly at Department of Earth Sciences, ETH Zürich, Soneggstrasse 5, 8092 Zürich, Switzerland

x Formerly at Laboratoire de Géologie, Ecole Normale Supérieure, CNRS - UMR 8538, 24 rue Lhomond, 75005 Paris, France

\* Corresponding author: gyorgy.hetenyi@unil.ch

---

**Figure S1.** Arc-Parallel Topography and Gravity Anomalies as a function of profile location along the orogen, north and south of the topography front (TF, closely following the Main Frontal Thrust MFT). The point clouds show that there is rarely a linear and positive correlation between APaTA and APaGA, unlike in the subduction zone cases presented by reference 7 of the manuscript.

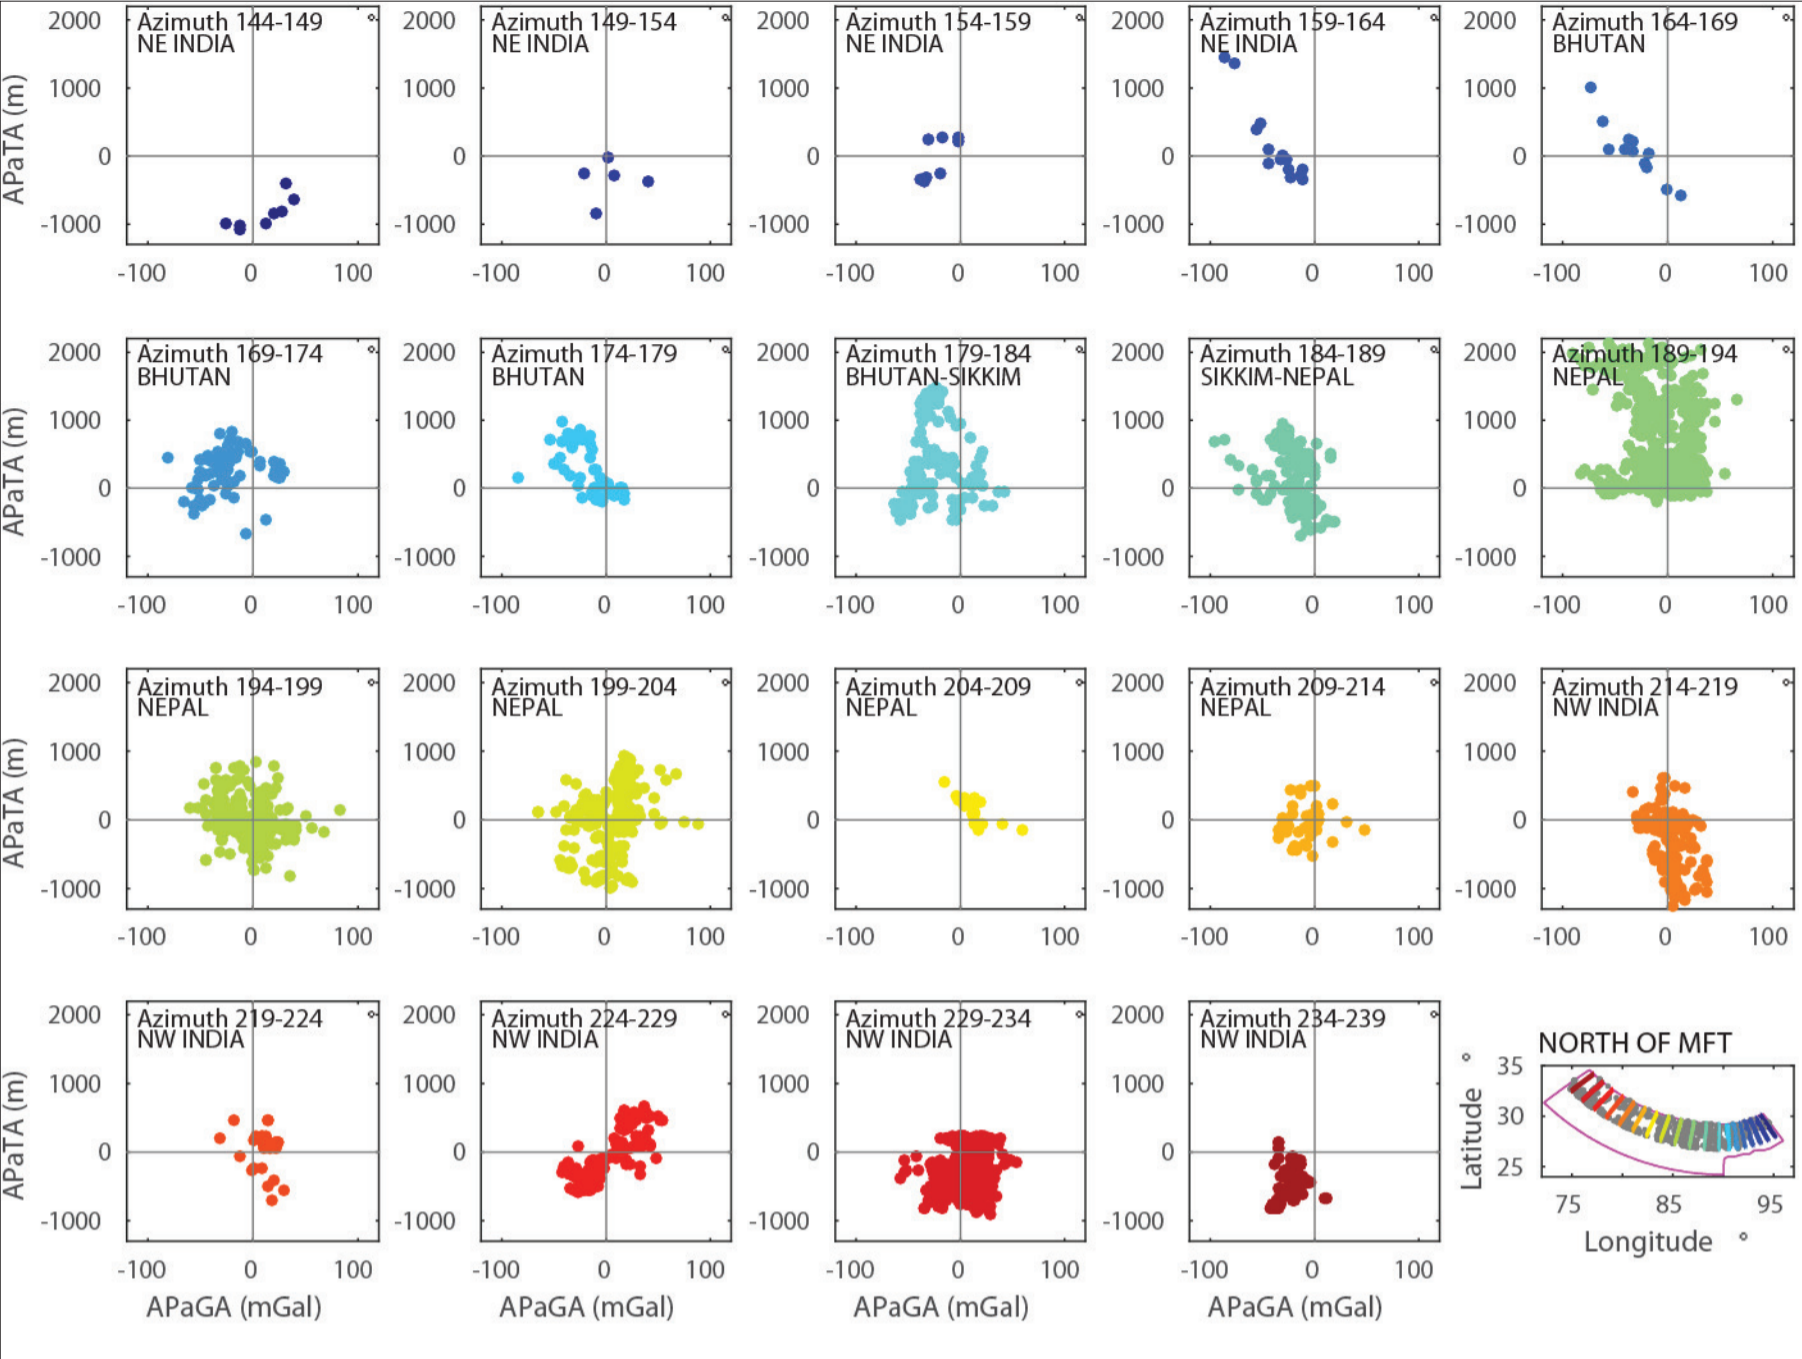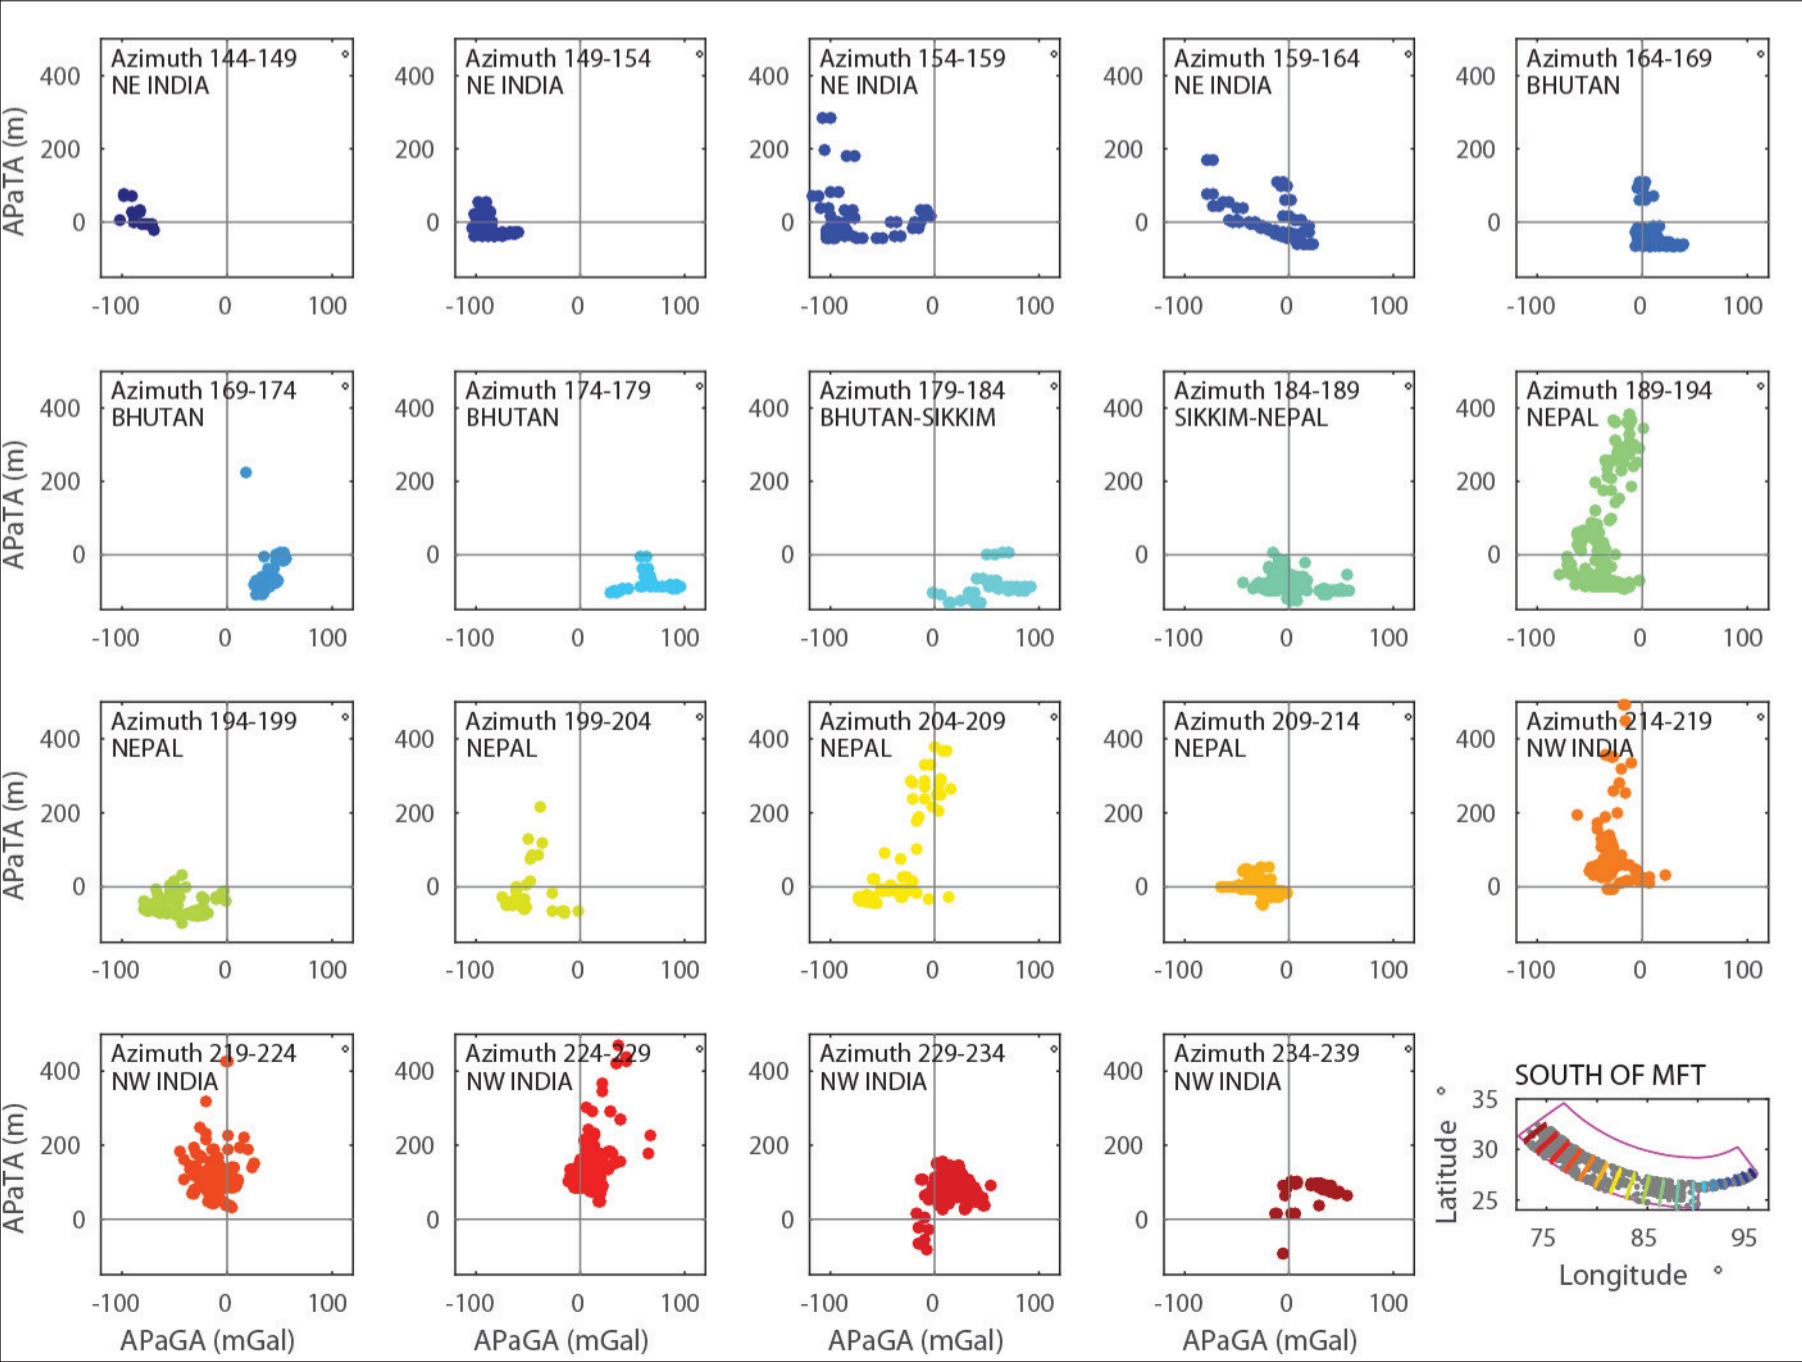

Supplement: srep33866-s1.pdf [file srep33866-s1.pdf]
